# Supplementary material for: Enhanced Biofilm Formation by Ferrous and Ferric Iron Through Oxidative Stress in Campylobacter jejuni
Source: PubMed Central journal article supplement (PMC5998592; doi:10.3389/fmicb.2018.01204), 2018-06-06
Supplement: Presentation_1.pdf [file Presentation_1.pdf]

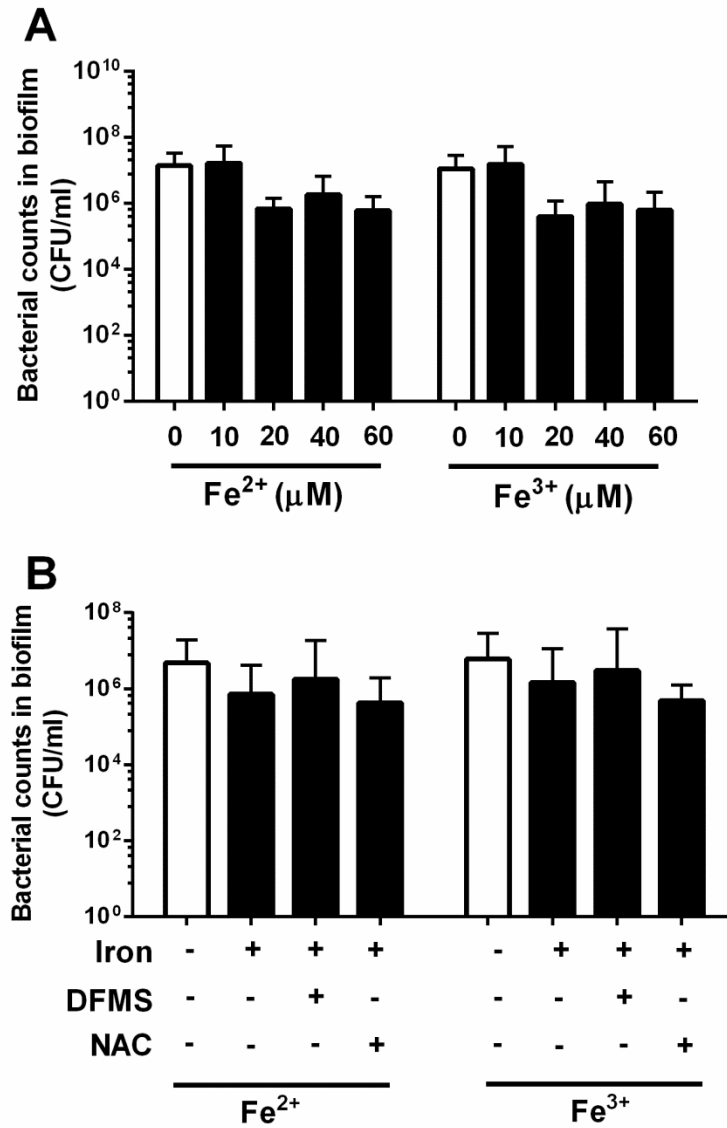

**Fig. S1.** *C. jejuni* counts in biofilms at different iron concentrations (A) and under the treatment conditions of iron (40 μM Fe<sub>2+</sub> and 20 μM Fe<sub>3+</sub>), 20 μM DFMS (deferoxamine mesylate, an iron chelator), and 1 μM NAC (N-acetylcysteine, an antioxidant) (B). Biofilms were incubated under microaerobic conditions for 24 h before enumeration. The experiment was conducted with triplicate samples and independently repeated three times. *C. jejuni* NCTC 11168 was used in the experiment.

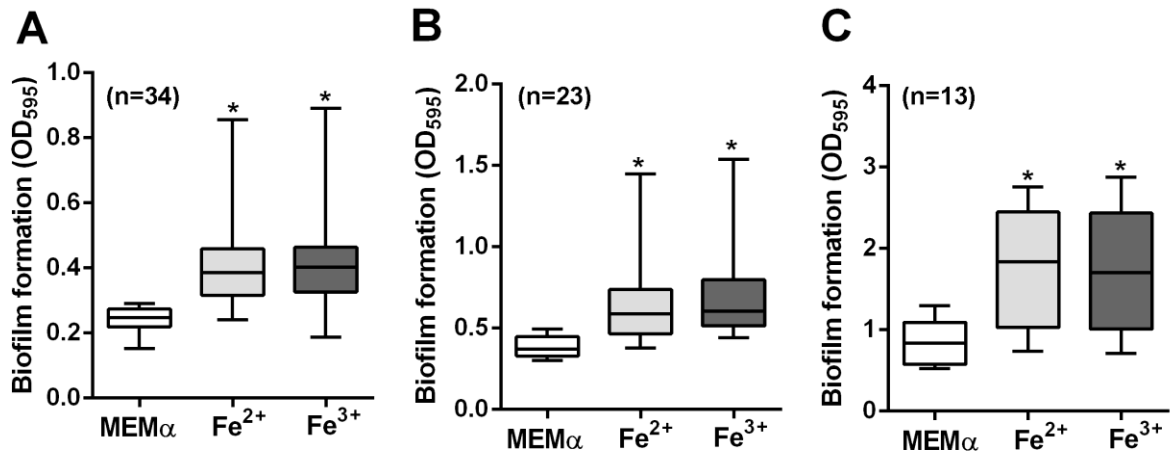

**Fig. S2. Increased biofilm formation by iron in 70 chicken isolates of *C. jejuni* forming biofilms at low (A), medium (B), and high (B) levels.** Biofilms were treated with 40  $\mu\text{M}$  Fe<sup>2+</sup> and 20  $\mu\text{M}$  Fe<sup>3+</sup>. The experiment was carried out with triplicate samples and repeated three times. The statistical analysis was performed with student's *t*-test compared to the untreated samples (MEM $\alpha$ ). \*:  $P < 0.05$ .
